# Supplementary material
Source: PubMed Central journal article supplement (PMC3944134)
Supplement: NIHMS531256-supplement-Supp_Fig_S1-S2.pdf [file NIHMS531256-supplement-Supp_Fig_S1-S2.pdf]

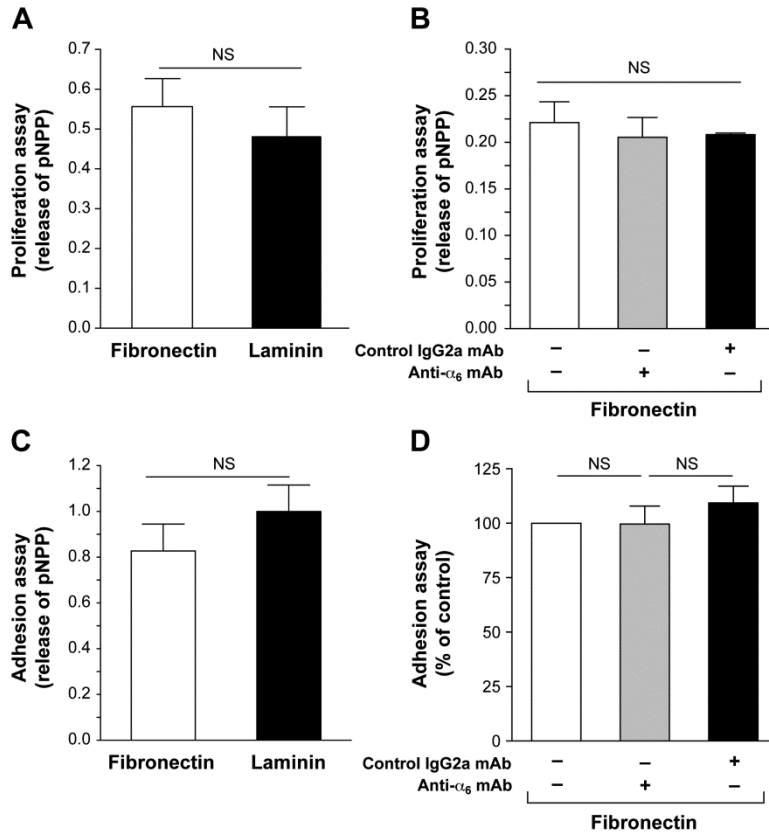

Supplemental Figure 1

## Supplemental Figure 1

- A-** Proliferation of HemSC cultured in EBM-2/20% over 4 days. Cellular phosphatase activity was the same when the cells were plated on fibronectin or laminin.
- B-** Proliferation of HemSC cultured in EBM-2/20% over 4 days evaluated by measuring cellular phosphatase activity. Proliferation on fibronectin-coated wells not affected by blocking mAb against  $\alpha_6$ -integrin.
- C-** Adhesion assay: cells allowed to adhere to fibronectin or laminin for 20 minutes. Number of adherent cells determined by *p*-NPP assay
- D-** Adhesion assay: cells allowed to adhere to fibronectin for 20 minutes. Number of adherent cells determined by *p*-NPP assay. In contrast to laminin (Figure 2C), adhesion on fibronectin was not affected by blocking mAb against  $\alpha_6$ -integrin.

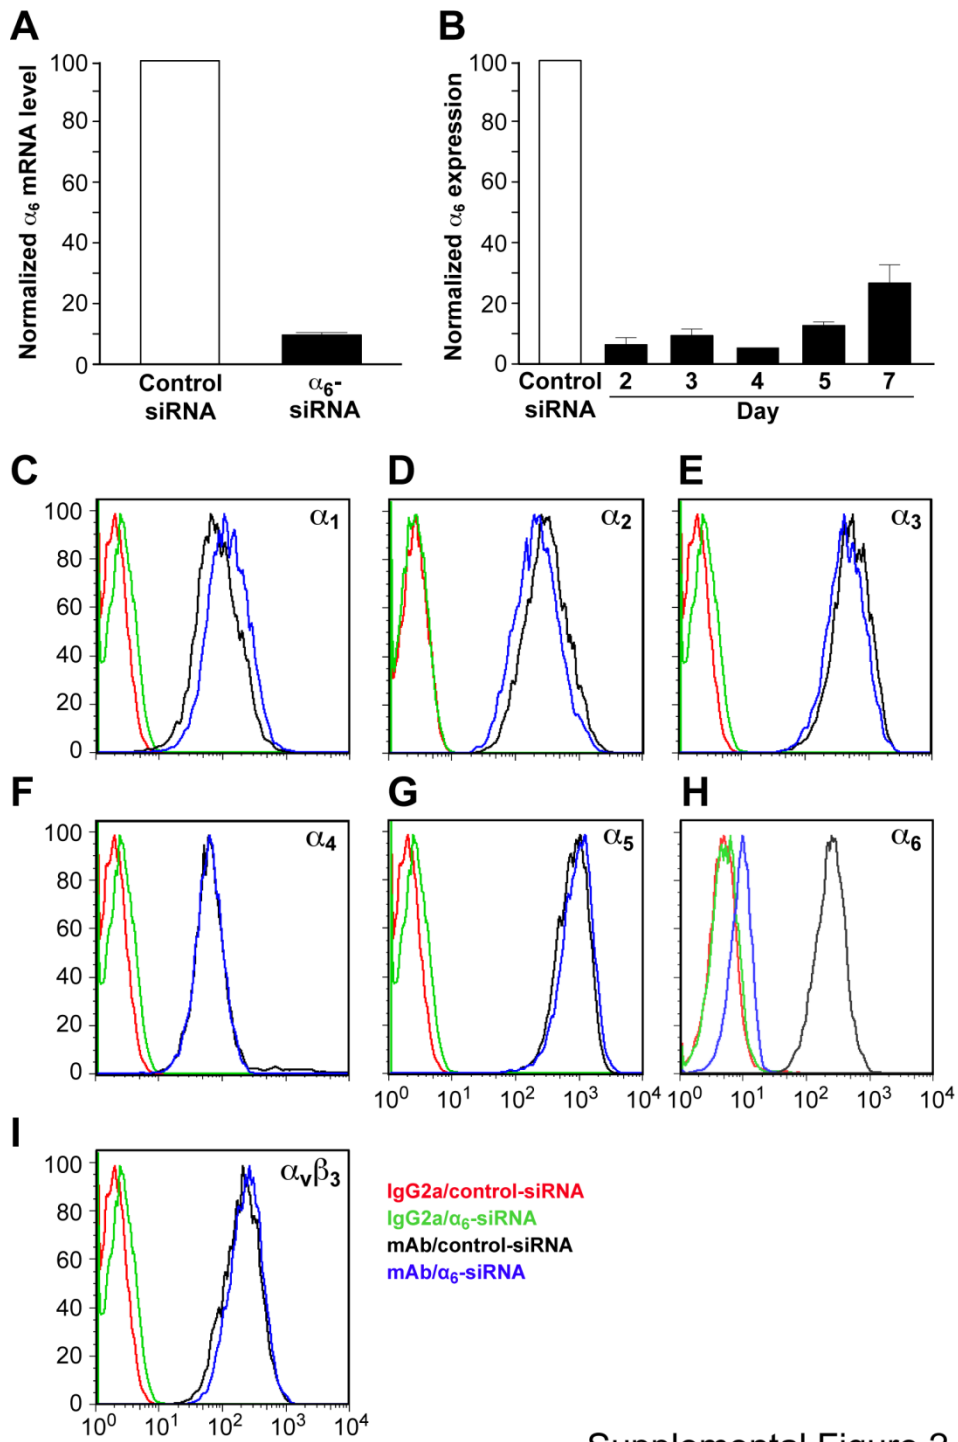

Supplemental Figure 2

**Supplemental Figure 2: Assessment of siRNA efficiency and specificity by qRT-PCR (A) and flow cytometry (B-I)**

**A** - HemSC cultured and transfected as described in Materials and Methods. At various times after transfection, quantity of  $\alpha 6$ -integrin subunit mRNA was determined by RT-qPCR.

**B** -  $\alpha 6$ -integrin protein expression at cell surface measured by flow cytometry from 2-to-7 days. Results for HemSC transfected siRNA  $\alpha 6$  integrin normalized to control siRNA-transfected HemSC. Results reported as means  $\pm$  S.E.M. of three different experiments.  $\alpha 6$ -Integrin subunit protein expression reduced on HemSC transfected with siRNA  $\alpha 6$  (about 10% of control value from day 2 to day 5 and 20% after 5 days).

**C-H** - At day 3 after siRNA transfection, quantity of  $\alpha 6$ -integrin subunit measured by flow cytometry (H) and compared to cell surface expression of integrins  $\alpha 1$  (C),  $\alpha 2$  (D),  $\alpha 3$  (E),  $\alpha 4$  (F),  $\alpha 5$  (G),  $\alpha v\beta 3$  (I) to verify the specificity of siRNA  $\alpha 6$  integrin transfection. No reduction in cell surface expression of other integrins observed. Isotype-matched control IgG2a binding to control siRNA-transfected shown as a red line and to  $\alpha 6$ -siRNA transfected HemSC as a green line. Integrin mAb binding to control siRNA transfected HemSC shown as a black line and to  $\alpha 6$ -siRNA transfected HemSC as blue line.
